# Supplementary material for: An audit and feedback intervention study increased adherence to antibiotic prescribing guidelines at a Norwegian hospital
Source: PubMed Central journal article supplement (PMC4769530; doi:10.1186/s12879-016-1426-1), 2016-02-27
Supplement: 12879_2016_1426_MOESM3_ESM.pdf [file 12879_2016_1426_MOESM3_ESM.pdf]

**Additional file 3: Antibiotic sensitivity patterns for culture isolates.**

Antibiotic sensitivity patterns for *S.pneumoniae* and *H.influenzae* in inpatients with Community-Acquired Pneumonia or Acute Exacerbation of Chronic Obstructive Pulmonary Disease.

| Antibiotic   | <i>S.pneumoniae</i> (n=22) |      |      | <i>H.influenzae</i> (n=25) |   |       |
|--------------|----------------------------|------|------|----------------------------|---|-------|
|              | S                          | I    | R    | S                          | I | R     |
| Penicillin   | 14/22                      | 8/22 | -    | -                          | - | -     |
| Ampicillin   | 14/15                      | 1/15 | -    | 20/25                      | - | 5/25  |
| Erythromycin | 17/22                      | -    | 5/22 | -                          | - | -     |
| Cefuroxime   | 14/14                      | -    | -    | 23/24                      | - | 1/24  |
| Cefotaxime   | 19/22                      | 3/22 | -    | 13/24                      | - | 11/24 |

S; Sensitive, I; Intermediate sensitive, R; resistant
