# Supplementary material for: An audit and feedback intervention study increased adherence to antibiotic prescribing guidelines at a Norwegian hospital
Source: PubMed Central journal article supplement (PMC4769530; doi:10.1186/s12879-016-1426-1), 2016-02-27
Supplement: 12879_2016_1426_MOESM4_ESM.pdf [file 12879_2016_1426_MOESM4_ESM.pdf]

**Additional file 4: Detailed information on treatment versus outcome for patients with identified pathogens (n=92).**

| <b>ID-no</b> | <b>Empirical antibiotic</b>   | <b>CRB-65 score</b> | <b>Pathogen</b>      | <b>Total treatment duration</b> | <b>Length of stay</b> | <b>30-day mortality (0;no, 1;yes)</b> | <b>30-day readmission (0;no, 1;yes)</b> |
|--------------|-------------------------------|---------------------|----------------------|---------------------------------|-----------------------|---------------------------------------|-----------------------------------------|
| 1            | Cefuroxime                    | MD                  | <i>S.pneumoniae</i>  | 13                              | 6                     | 0                                     | 0                                       |
| 2            | Benzylpenicillin              | 2                   | <i>S.pneumoniae</i>  | 13                              | 3                     | 0                                     | 1                                       |
| 3            | Benzylpenicillin + gentamicin | 1                   | <i>S.pneumoniae</i>  | 9                               | 3                     | 0                                     | 0                                       |
|              |                               |                     | <i>M.catarrhalis</i> |                                 |                       |                                       |                                         |
| 4            | Benzylpenicillin + gentamicin | 1                   | <i>S.pneumoniae</i>  | 14                              | 10                    | 0                                     | 0                                       |
| 5            | Benzylpenicillin              | NA                  | <i>S.pneumoniae</i>  | 9                               | 3                     | 0                                     | 1                                       |
|              |                               |                     | <i>P.auerginosa</i>  |                                 |                       |                                       |                                         |
| 6            | Benzylpenicillin              | 0                   | <i>S.pneumoniae</i>  | 10                              | 6                     | 0                                     | 0                                       |
| 7            | Benzylpenicillin              | 0                   | <i>S.pneumoniae</i>  | 11                              | 1                     | 0                                     | 1                                       |
| 8            | Benzylpenicillin              | NA                  | <i>S.pneumoniae</i>  | 10                              | 3                     | 0                                     | 0                                       |
| 9            | Doxycycline                   | NA                  | <i>S.pneumoniae</i>  | 12                              | 17                    | 0                                     | 0                                       |
| 10           | Benzylpenicillin              | 3                   | <i>S.pneumoniae</i>  | -                               | -                     | 1                                     | -                                       |
| 11           | Doxycycline                   | NA                  | <i>S.pneumoniae</i>  | 9                               | 1                     | 0                                     | 1                                       |
| 12           | Benzylpenicillin              | 1                   | <i>S.pneumoniae</i>  | 14                              | 6                     | 0                                     | 1                                       |
| 13           | Benzylpenicillin              | 1                   | <i>S.pneumoniae</i>  | 15                              | 9                     | 0                                     | 0                                       |
| 14           | Benzylpenicillin              | 2                   | <i>S.pneumoniae</i>  | 14                              | 4                     | 0                                     | 0                                       |
| 15           | Cefotaxime                    | 3                   | <i>S.pneumoniae</i>  | 30                              | 21                    | 0                                     | 0                                       |
| 16           | Benzylpenicillin              | 1                   | <i>S.pneumoniae</i>  | 11                              | 4                     | 0                                     | 0                                       |
| 17           | Benzylpenicillin + gentamicin | 1                   | <i>S.pneumoniae</i>  | 14                              | 7                     | 0                                     | 0                                       |
| 18           | Cefotaxime                    | 3                   | <i>S.pneumoniae</i>  | 13                              | 9                     | 0                                     | 0                                       |
| 19           | Benzylpenicillin + gentamicin | 2                   | <i>S.pneumoniae</i>  | 10                              | 6                     | 0                                     | 1                                       |
|              |                               |                     | <i>M.catarrhalis</i> |                                 |                       |                                       |                                         |
| 20           | Benzylpenicillin              | 1                   | <i>S.pneumoniae</i>  | 14                              | 3                     | 0                                     | 0                                       |
| 21           | Benzylpenicillin              | 1                   | <i>S.pneumoniae</i>  | 11                              | -                     | 1                                     | -                                       |
| 22           | Doxycycline                   | MD                  | <i>S.pneumoniae</i>  | 11                              | 8                     | 0                                     | 0                                       |
| 23           | Benzylpenicillin              | 1                   | <i>S.pneumoniae</i>  | -                               | .                     | 1                                     | -                                       |
| 24           | Benzylpenicillin              | NA                  | <i>S.pneumoniae</i>  | 15                              | 8                     | 0                                     | 0                                       |

|    |                                  |    |                      |    |    |   |   |
|----|----------------------------------|----|----------------------|----|----|---|---|
| 25 | Benzylpenicillin                 | 2  | <i>S.pneumoniae</i>  | 18 | 34 | 0 | 1 |
| 26 | Benzylpenicillin                 | MD | <i>S.pneumoniae</i>  | 9  | 15 | 0 | 0 |
|    |                                  |    | <i>M.catarrhalis</i> |    |    |   |   |
| 27 | Benzylpenicillin                 | 1  | <i>S.pneumoniae</i>  | 9  | 3  | 0 | 0 |
| 28 | Ceftriaxone                      | 2  | <i>S.pneumoniae</i>  | 14 | 19 | 0 | 0 |
| 29 | Amoxicillin                      | NA | <i>S.pneumoniae</i>  | 7  | 3  | 0 | 1 |
| 30 | Benzylpenicillin                 | 3  | <i>S.pneumoniae</i>  | 11 | 12 | 0 | 0 |
| 31 | Benzylpenicillin + gentamicin    | 1  | <i>S.pneumoniae</i>  | 12 | 3  | 0 | 1 |
| 32 | Benzylpenicillin + gentamicin    | 1  | <i>S.pneumoniae</i>  | 11 | 4  | 0 | 1 |
| 33 | Benzylpenicillin                 | 1  | <i>S.pneumoniae</i>  | 12 | 8  | 0 | 0 |
| 34 | Benzylpenicillin                 | 2  | <i>S.pneumoniae</i>  | 15 | 8  | 0 | 0 |
| 35 | Benzylpenicillin + gentamicin    | 1  | <i>S.pneumoniae</i>  | -  | -  | 1 | - |
| 36 | Benzylpenicillin                 | 2  | <i>S.pneumoniae</i>  | 9  | 2  | 0 | 0 |
| 37 | Amoxicillin                      | NA | <i>S.pneumoniae</i>  | 5  | 4  | 0 | 0 |
| 38 | Benzylpenicillin                 | 3  | <i>S.pneumoniae</i>  | 19 | 10 | 0 | 0 |
| 39 | Benzylpenicillin                 | NA | <i>S.pneumoniae</i>  | 9  | 4  | 0 | 0 |
| 40 | Benzylpenicillin                 | MD | <i>S.pneumoniae</i>  | 9  | 4  | 0 | 0 |
| 41 | Benzylpenicillin + gentamicin    | 3  | <i>S.pneumoniae</i>  | -  | -  | 1 | - |
| 42 | Benzylpenicillin                 | 3  | <i>S.pneumoniae</i>  | 11 | 5  | 0 | 0 |
| 43 | Benzylpenicillin + ciprofloxacin | 2  | <i>S.pneumoniae</i>  | -  | -  | 1 | - |
|    |                                  |    | <i>S.aureus</i>      |    |    |   |   |
| 44 | Meropenem                        | 3  | <i>S.pneumoniae</i>  | 11 | 8  | 0 | 1 |
| 45 | Cefotaxime                       | 4  | <i>S.pneumoniae</i>  | 9  | -  | 1 | - |
| 46 | Benzylpenicillin                 | NA | <i>S.pneumoniae</i>  | 8  | 4  | 0 | 0 |
| 47 | Benzylpenicillin + gentamicin    | 1  | <i>H.influenzae</i>  | 16 | 9  | 0 | 0 |
| 48 | Benzylpenicillin                 | 2  | <i>H.influenzae</i>  | 15 | 6  | 0 | 0 |
| 49 | Cefotaxime                       | 1  | <i>H.influenzae</i>  | 11 | 4  | 0 | 0 |
| 50 | Erythromycin                     | 1  | <i>H.influenzae</i>  | 9  | 6  | 0 | 1 |
| 51 | Benzylpenicillin                 | 1  | <i>H.influenzae</i>  | 15 | 8  | 0 | 0 |
| 52 | Benzylpenicillin                 | 1  | <i>H.influenzae</i>  | 13 | 3  | 0 | 0 |
| 53 | Doxycycline                      | 1  | <i>H.influenzae</i>  | 12 | 4  | 0 | 1 |
| 54 | Benzylpenicillin                 | 2  | <i>H.influenzae</i>  | 14 | 4  | 0 | 0 |

|    |                                |    |                       |    |    |   |   |
|----|--------------------------------|----|-----------------------|----|----|---|---|
| 55 | Benzylopenicillin              | 0  | <i>H.influenzae</i>   | 10 | 3  | 0 | 0 |
| 56 | Doxycycline                    | NA | <i>H.influenzae</i>   | 10 | 4  | 0 | 0 |
| 57 | Doxycycline                    | NA | <i>H.influenzae</i>   | 9  | 2  | 0 | 1 |
| 58 | Cefotaxime                     | 1  | <i>H.influenzae</i>   | 11 | 4  | 0 | 0 |
| 59 | Amoxicillin                    | NA | <i>H.influenzae</i>   | 7  | 3  | 0 | 0 |
| 60 | Benzylopenicillin              | 2  | <i>H.influenzae</i>   | 15 | 9  | 0 | 0 |
| 61 | Gentamicin + clindamycin       | NA | <i>H.influenzae</i>   | 10 | 5  | 0 | 0 |
| 62 | Benzylopenicillin              | MD | <i>H.influenzae</i>   | 10 | 5  | 0 | 0 |
| 63 | Amoxicillin                    | NA | <i>H.influenzae</i>   | 10 | 9  | 0 | 0 |
| 64 | Benzylopenicillin + gentamicin | 2  | <i>H.influenzae</i>   | 10 | 9  | 0 | 0 |
| 65 | Benzylopenicillin              | MD | <i>H.influenzae</i>   | -  | -  | 1 | - |
| 66 | Benzylopenicillin              | 2  | <i>H.influenzae</i>   | 12 | 1  | 0 | 0 |
| 67 | Benzylopenicillin              | 3  | <i>H.influenzae</i>   | 14 | 34 | 0 | 0 |
| 68 | Benzylopenicillin              | 1  | <i>H.influenzae</i>   | 10 | 3  | 0 | 1 |
| 69 | Benzylopenicillin              | 1  | <i>H.influenzae</i>   | 15 | 8  | 0 | 0 |
| 70 | Benzylopenicillin              | 2  | <i>H.influenzae</i>   | 11 | 4  | 0 | 0 |
| 71 | Ampicillin                     | 3  | <i>H.influenzae</i>   | 7  | 14 | 0 | 0 |
| 72 | Benzylopenicillin              | 0  | <i>M.pneumoniae</i>   | 12 | 2  | 0 | 0 |
| 73 | Benzylopenicillin              | 0  | <i>M.pneumoniae</i>   | 25 | 11 | 0 | 0 |
| 74 | Meropenem                      | 1  | <i>K.pneumoniae</i>   | 7  | 7  | 0 | 0 |
| 75 | Meropenem                      | 1  | <i>K.pneumoniae</i>   | 5  | 5  | 0 | 1 |
| 76 | Benzylopenicillin              | 1  | <i>K.pneumoniae</i>   | 12 | 12 | 0 | 0 |
| 77 | Benzylopenicillin              | 1  | <i>S.aureus</i>       | 13 | 4  | 0 | 0 |
| 78 | Benzylopenicillin + gentamicin | 1  | <i>S.aureus</i>       | 14 | 6  | 0 | 1 |
| 79 | Benzylopenicillin + gentamicin | 2  | <i>S.aureus</i>       | 13 | 14 | 0 | 0 |
|    |                                |    | <i>P. aeruginosa</i>  |    |    |   |   |
| 80 | Piperacillin + Tazobactam      | 1  | <i>S.aureus</i>       | 13 | 6  | 0 | 0 |
| 81 | Doxycycline                    | NA | <i>M. catarrhalis</i> | 16 | 6  | 0 | 1 |
| 82 | Benzylopenicillin              | 1  | <i>M. catarrhalis</i> | 15 | 11 | 0 | 0 |
| 83 | Benzylopenicillin              | 2  | <i>S.pyogenes</i>     | 12 | 6  | 0 | 0 |
| 84 | Benzylopenicillin              | NA | <i>P. aeruginosa</i>  | 15 | 11 | 0 | 0 |

|    |                               |    |                      |    |    |   |   |
|----|-------------------------------|----|----------------------|----|----|---|---|
| 85 | Doxycycline                   | NA | <i>P. aeruginosa</i> | 14 | 14 | 0 | 0 |
| 86 | Benzylpenicillin              | 2  | <i>P. aeruginosa</i> | 15 | 4  | 0 | 0 |
| 87 | Amoxicillin                   | NA | <i>P. aeruginosa</i> | 15 | 5  | 0 | 1 |
| 88 | Cefotaxime                    | 1  | <i>P. aeruginosa</i> | 13 | 3  | 0 | 0 |
| 89 | Cefuroxime                    | 1  | <i>P. aeruginosa</i> | 14 | 14 | 0 | 0 |
| 90 | Cefotaxime                    | 4  | <i>P. aeruginosa</i> | -  | -  | 1 | - |
| 91 | Meropenem                     | MD | <i>P. aeruginosa</i> | 12 | 14 | 0 | 0 |
| 92 | Benzylpenicillin + gentamicin | 2  | <i>P. aeruginosa</i> | 12 | 3  | 0 | 1 |

CRB-65; Confusion, respiration, blood-pressure and age  $\geq$  65 years, MD; missing data, NA; not applicable for patients with acute exacerbation of chronic obstructive pulmonary disease
