# Supplementary material for: An audit and feedback intervention study increased adherence to antibiotic prescribing guidelines at a Norwegian hospital
Source: Springer Nature journal article supplement (doi:10.1186/s12879-016-1426-1), 2016-02-26
Supplement: MOESM1 [file 9740848]

**Additional file 1: Differences in study outcome measures for appropriate and inappropriate empirical antibiotics (n=408)**

|                            | <b>Appropriate empirical antibiotic treatment</b> | <b>Inappropriate empirical antibiotic treatment</b> | <b>P-value</b> |
|----------------------------|---------------------------------------------------|-----------------------------------------------------|----------------|
| Length of stay in hospital | 5.6 days                                          | 5.5 days                                            | NS             |
| 30-day readmission         | 50/268 (18.7%)                                    | 29/117 (24.8%)                                      | NS             |
| 30-day mortality           | 24/286 (8.4%)                                     | 8/122 (6.6%)                                        | NS             |
| CRB-65                     |                                                   |                                                     | NS             |
| 0                          | 31/190 (16.3%)                                    | 10/69 (14.5%)                                       |                |
| 1                          | 73/190 (38.4%)                                    | 26/69 (37.7%)                                       |                |
| 2                          | 58/190 (30.5%)                                    | 22/69 (31.9%)                                       |                |
| 3                          | 11/190 (5.8%)                                     | 7/69 (10.1%)                                        |                |
| 4                          | 2/190 (1.1%)                                      | 1/69 (1.4%)                                         |                |
| MD                         | 15/190 (7.9%)                                     | 3/69 (4.3%)                                         |                |
| Total treatment duration   | 10.9 days                                         | 10.8 days                                           | NS             |

Note: Study outcome measures (and CRB-65) for appropriate (i.e. benzylpenicillin in monotherapy or in combination with gentamicin, or ampicillin/amoxicillin) and inappropriate (i.e. all other antibiotics) empirical antibiotic treatment is tested on all 408 patients. Subgroup-analysis on patients with identified pathogens (n=92), also provide non-significant results.

CRB-65; Confusion, respiration, blood-pressure and age  $\geq$  65 years (only calculated for patients with community-acquired pneumonia), MD; missing data, NS; data is considered non-significant when  $P > 0.05$ , tested with Chi-square test of Student's t-test.
