# Supplementary material for: An audit and feedback intervention study increased adherence to antibiotic prescribing guidelines at a Norwegian hospital
Source: Springer Nature journal article supplement (doi:10.1186/s12879-016-1426-1), 2016-02-26
Supplement: MOESM2 [file 9740848]

**Additional file 2: Bacterial findings and contribution of different methods to diagnostic yield**

| Pathogen                                   | No. of patients with positive findings | Blood culture | Urine antigen test | BAL/ pleural fluid | Sputum culture | Throat culture | NP culture | PCR from NP culture | Serology |
|--------------------------------------------|----------------------------------------|---------------|--------------------|--------------------|----------------|----------------|------------|---------------------|----------|
| <i>Streptococcus pneumoniae</i>            | 46                                     | 2             | 35                 | NA                 | 13             | 5              | 5          | NA                  | NA       |
| <i>Haemophilus influenzae</i>              | 25                                     | NA            | NA                 | 3                  | 15             | 3              | 4          | NA                  | NA       |
| <i>Pseudomonas aeruginosa</i> <sup>a</sup> | 11                                     | 1             | NA                 | NA                 | 9              | 2              | 1          | NA                  | NA       |
| <i>Staphylococcus aureus</i>               | 5                                      | 2             | NA                 | NA                 | 3              | 1              | 1          | NA                  | NA       |
| <i>Klebsiella pneumoniae</i>               | 3                                      | NA            | NA                 | NA                 | 4              | NA             | NA         | NA                  | NA       |
| <i>Moraxella catarrhalis</i>               | 4                                      | NA            | NA                 | NA                 | 3              | 1              | NA         | NA                  | NA       |
| <i>Mycoplasma pneumoniae</i>               | 2                                      | NA            | NA                 | NA                 | NA             | NA             | NA         | 1                   | 1        |
| <i>Streptococcus pyogenes (GAS)</i>        | 1                                      | NA            | NA                 | NA                 | NA             | 1              | NA         | NA                  | NA       |
| Total <sup>b</sup>                         | 97                                     | 6             | 33                 | 3                  | 49             | 12             | 11         | 1                   | 1        |

Note: Some patients had aetiology established by use of different methods.

BAL; bronchoalveolar lavage; NA; not applicable/not tested, NP; nasopharynx, PCR; polymerase chain reaction

<sup>a</sup> *Pseudomonas aeruginosa* was identified in 7 different patients (two patients had multiple admissions where the specific pathogen was identified)

<sup>b</sup> Five patients had multiple pathogens; a total of 97 pathogens were identified in 92 patients.
